# Supplementary material for: Retinal Dystrophies Associated With Peripherin-2: Genetic Spectrum and Novel Clinical Observations in 241 Patients
Source: PubMed Central journal article supplement — Invest Ophthalmol Vis Sci. 2024 May 14;65(5):22. doi: 10.1167/iovs.65.5.22 (PMC11098050; doi:10.1167/iovs.65.5.22), 2024-05-14

### Supplementary Material S3

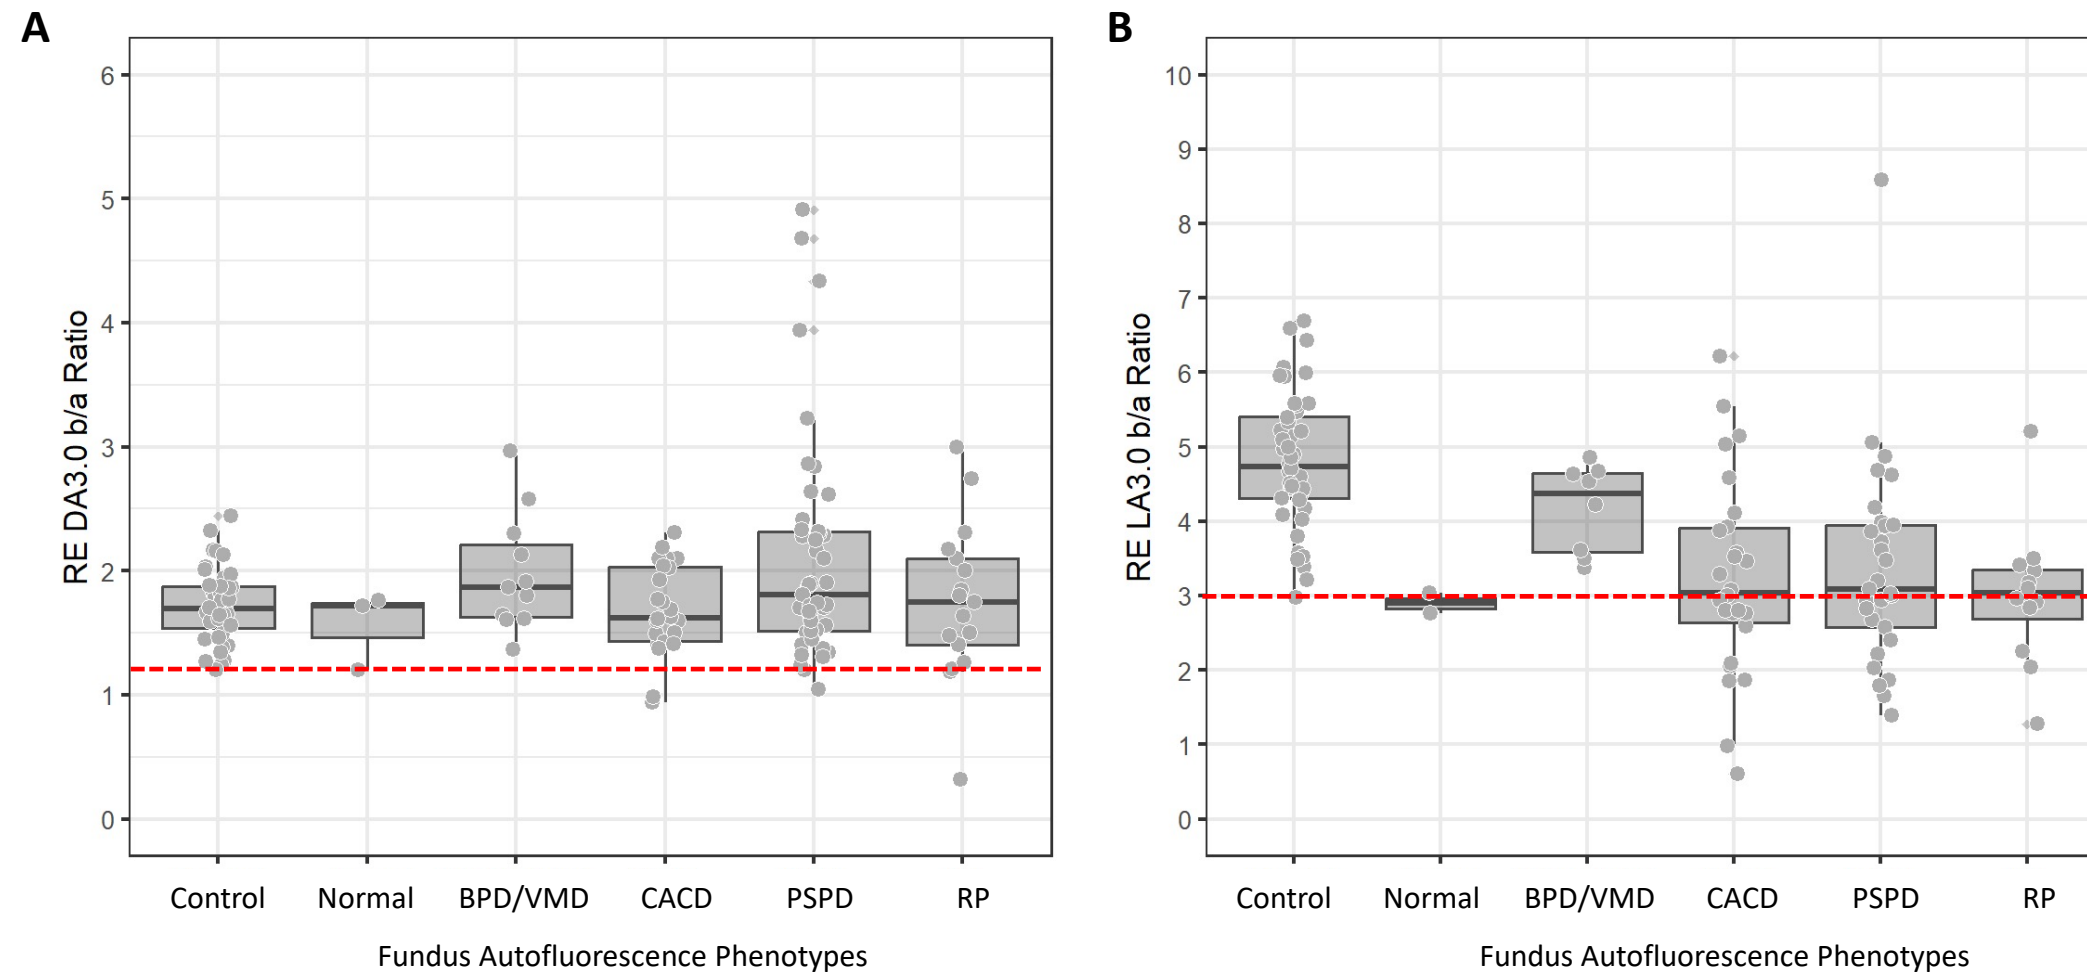

Dark adapted (DA) 3.0 b:a ratio box plot comparing fundus autofluorescence (FAF) phenotypes against healthy subjects showing most have a b:a ratio above 1.2 (red dashed line) (A). Light adapted (LA) 3.0 b:a ratio box plot showing significant reduction in b:a ratio in those with CACD, PSPD and RP (B).

Full-field electrophysiology b-wave amplitude and peak time comparison with normal controls at the Lions Eye Institute, Perth, Australia.

Dark adapted 0.01 (A, B) shows a reduced amplitude and delayed b-wave.

30 Hz flicker (C, D) shows a reduced amplitude and slight delay in peak time.

Overall there is more rod system involvement compared to cone system involvement.

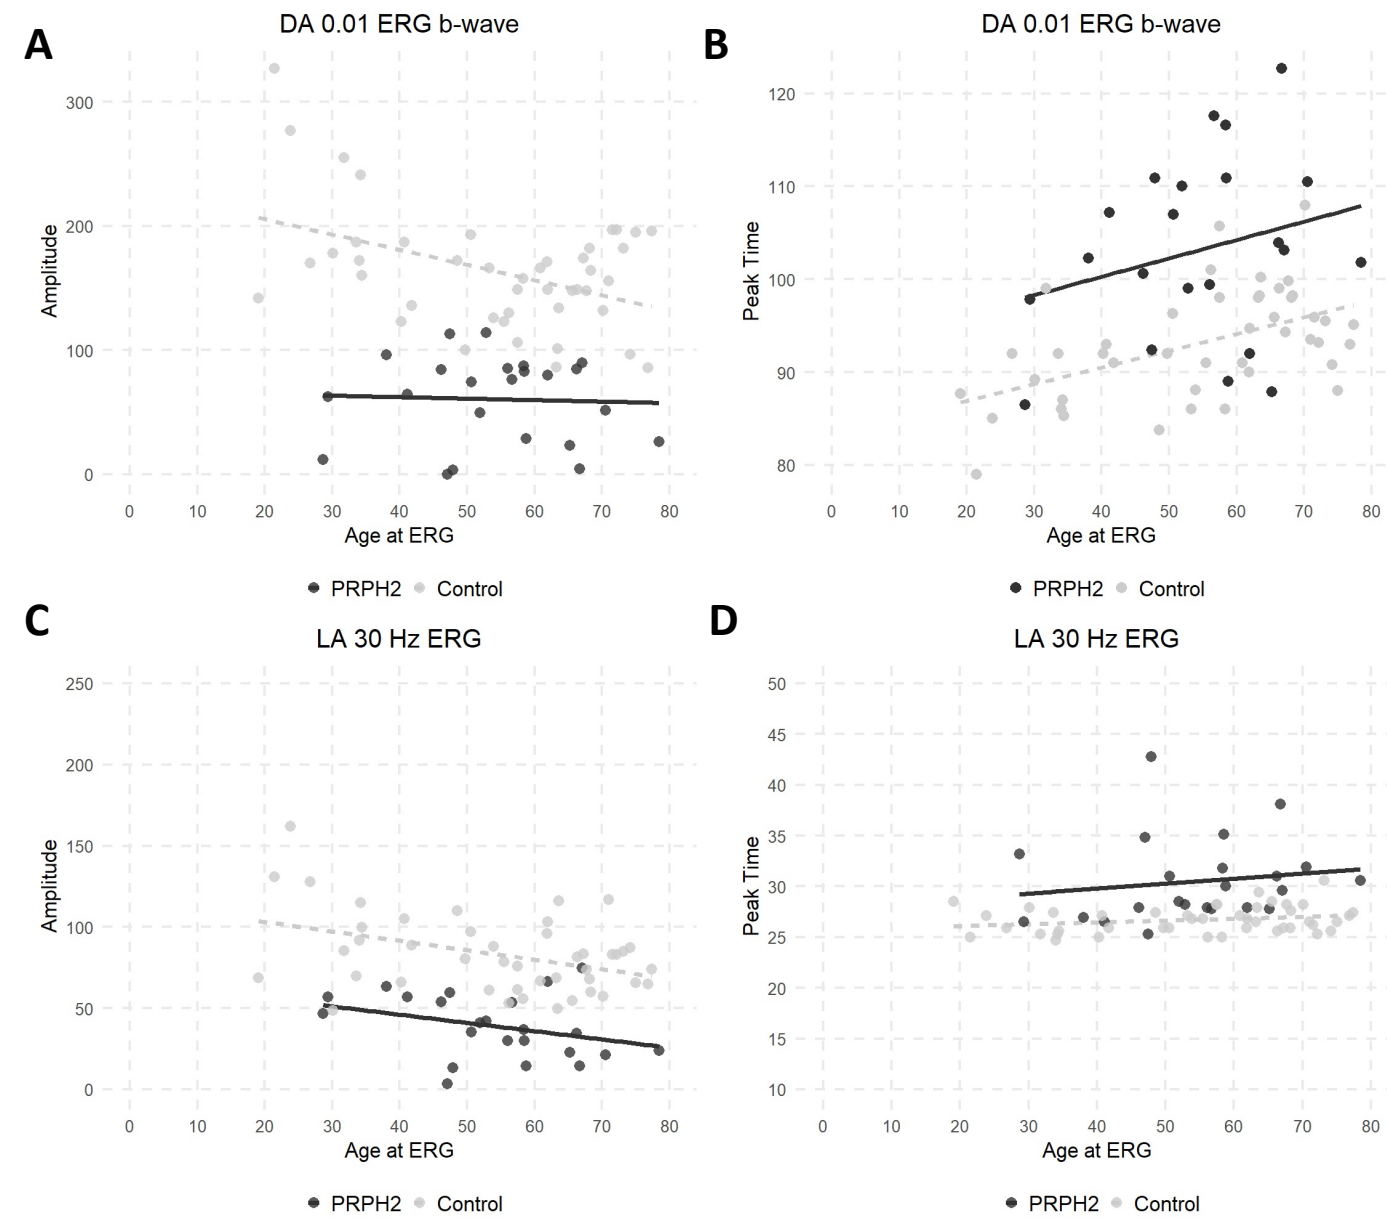

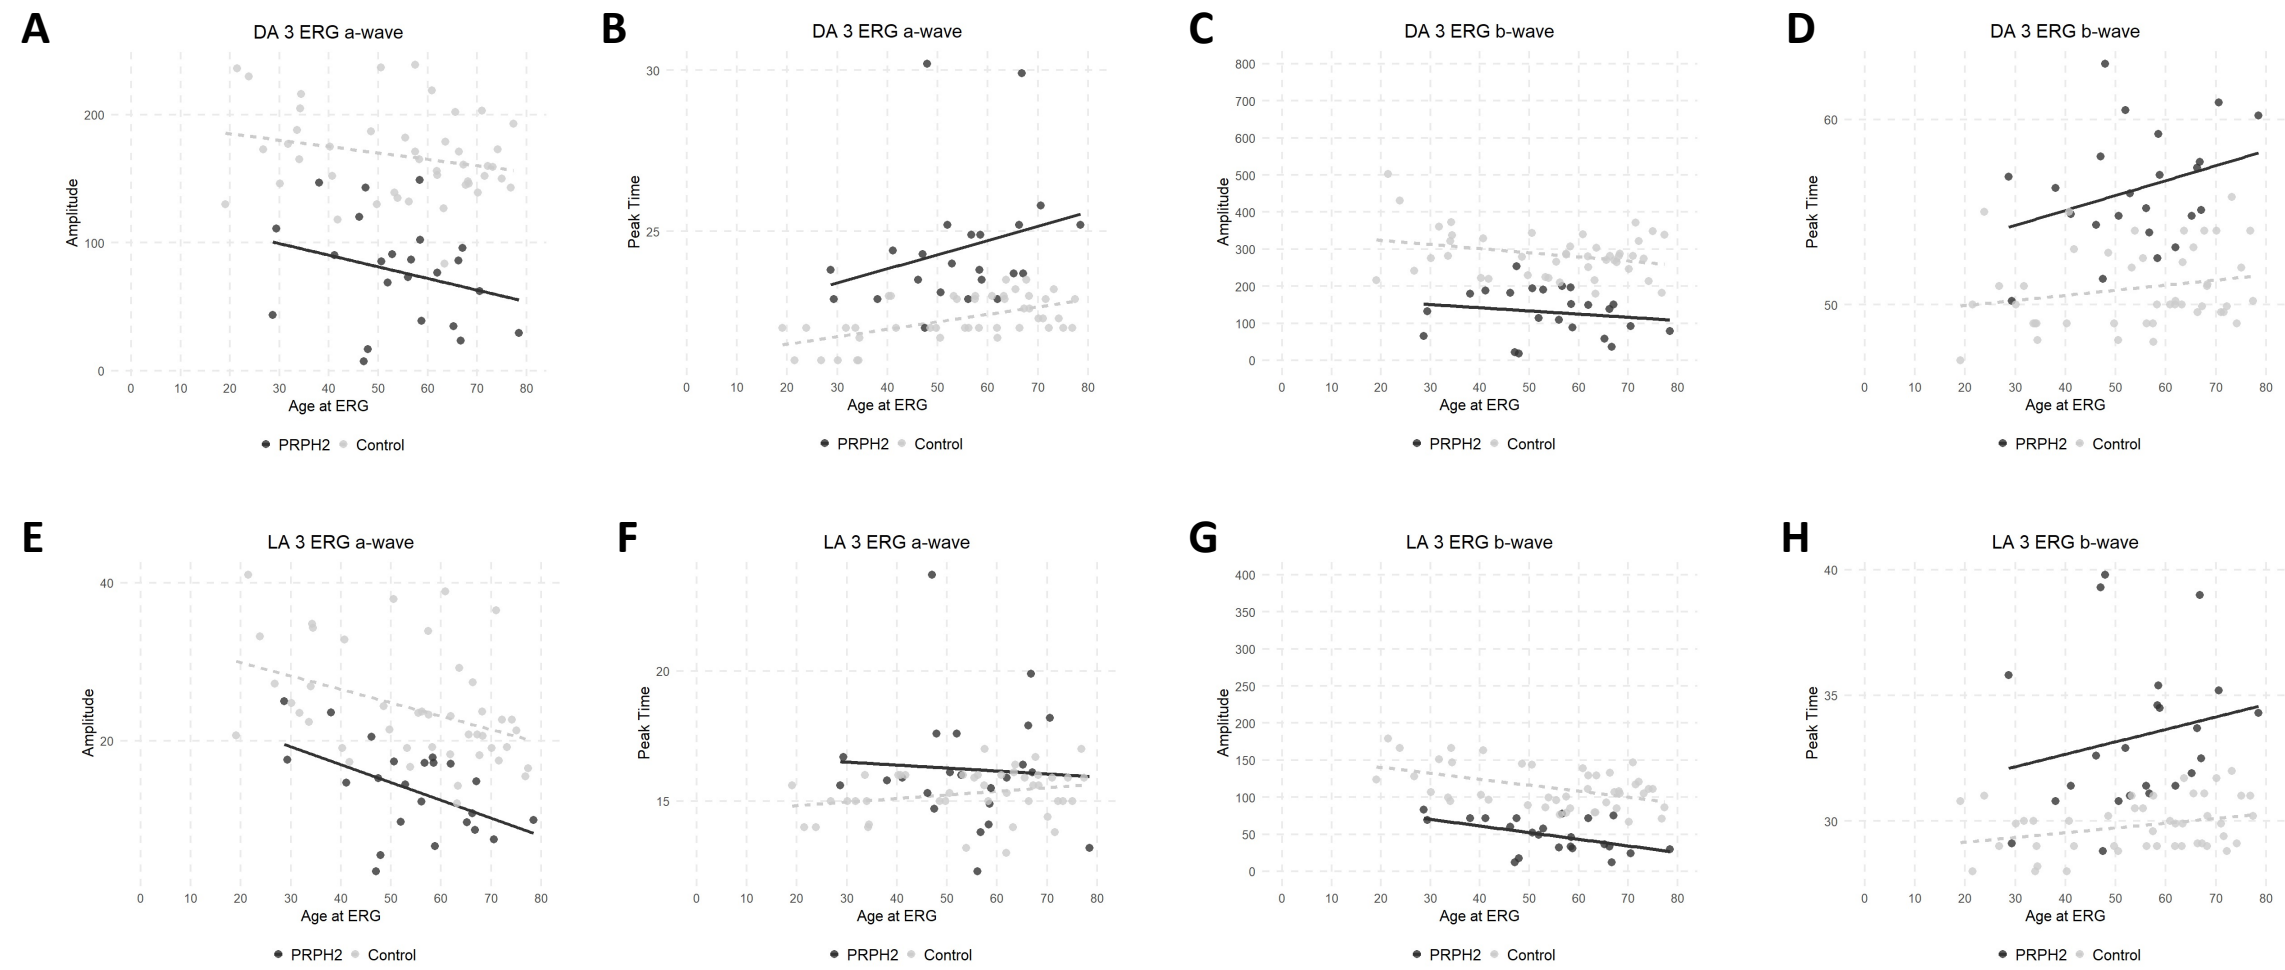

**Full-field electrophysiology a- and b-wave comparison with normal controls at the Lions Eye Institute, Perth.**

Dark adapted 3.0 (A-D) responses showed a reduction and delay in the a- and b-waves.

Light adapted 3.0 (E-H) responses showed a reduction in the a- and b-wave amplitudes. The b-wave peak time was delayed. There was more significant rod photoreceptor dysfunction.

Slope and significance of the goodness of fit of the regression lines featured in Figures 7 and 8

|              |           | PRPH2 - Overall |              |                |         | PRPH2 - LEI |              |                |         | Control |              |                |         |
|--------------|-----------|-----------------|--------------|----------------|---------|-------------|--------------|----------------|---------|---------|--------------|----------------|---------|
|              |           | N               | Slope (SE)   | R <sup>2</sup> | p-Value | N           | Slope (SE)   | R <sup>2</sup> | p-Value | N       | Slope (SE)   | R <sup>2</sup> | p-Value |
| DA0.01       | Peak Time | 81              | 0.33 (0.10)  | 0.12           | 0.002   | 22          | 0.20 (0.17)  | 0.07           | 0.249   | 44      | 0.18 (0.05)  | 0.26           | <0.001  |
|              | Amplitude | 90              | -2.37 (0.78) | 0.09           | 0.003   | 23          | -0.12 (0.61) | 0.00           | 0.848   | 44      | -1.23 (0.40) | 0.18           | 0.004   |
| DA3.0 a-wave | Peak Time | 109             | 0.04 (0.03)  | 0.01           | 0.220   | 23          | 0.04 (0.03)  | 0.08           | 0.198   | 44      | 0.02 (0.01)  | 0.31           | <0.001  |
|              | Amplitude | 118             | -1.84 (0.54) | 0.09           | 0.001   | 23          | -0.91 (0.69) | 0.08           | 0.199   | 44      | -0.50 (0.31) | 0.06           | 0.111   |
| DA3.0 b-wave | Peak Time | 111             | -0.01 (0.05) | 0.00           | 0.850   | 23          | 0.08 (0.05)  | 0.10           | 0.134   | 44      | 0.03 (0.02)  | 0.04           | 0.167   |
|              | Amplitude | 118             | -3.79 (0.87) | 0.14           | <0.001  | 23          | -0.86 (1.10) | 0.03           | 0.443   | 44      | -1.12 (0.56) | 0.09           | 0.053   |
| LA 30 Hz     | Peak Time | 110             | 0.05 (0.03)  | 0.02           | 0.145   | 23          | 0.05 (0.07)  | 0.02           | 0.497   | 44      | 0.02 (0.01)  | 0.05           | 0.128   |
|              | Amplitude | 115             | -0.97 (0.23) | 0.14           | <0.001  | 23          | -0.51 (0.32) | 0.11           | 0.124   | 44      | -0.58 (0.20) | 0.16           | 0.007   |
| LA3.0 a-wave | Peak Time | 85              | 0.00 (0.03)  | 0.00           | 0.934   | 23          | -0.01 (0.04) | 0.08           | 0.781   | 44      | 0.01 (0.01)  | 0.06           | 0.105   |
|              | Amplitude | 93              | -0.62 (0.12) | 0.22           | <0.001  | 23          | -0.23 (0.08) | 0.25           | 0.014   | 44      | -0.17 (0.06) | 0.16           | 0.007   |
| LA3.0 b-wave | Peak Time | 87              | 0.01 (0.03)  | 0.00           | 0.785   | 23          | 0.05 (0.05)  | 0.04           | 0.348   | 44      | 0.02 (0.01)  | 0.09           | 0.044   |
|              | Amplitude | 93              | -1.28 (0.45) | 0.08           | 0.005   | 23          | -0.90 (0.34) | 0.25           | 0.016   | 44      | -0.80 (0.23) | 0.23           | 0.001   |

SE = Standard Error

## ERG tracings and FAF imaging demonstrating the variable effect of CACD phenotype on macular, cone and rod functions

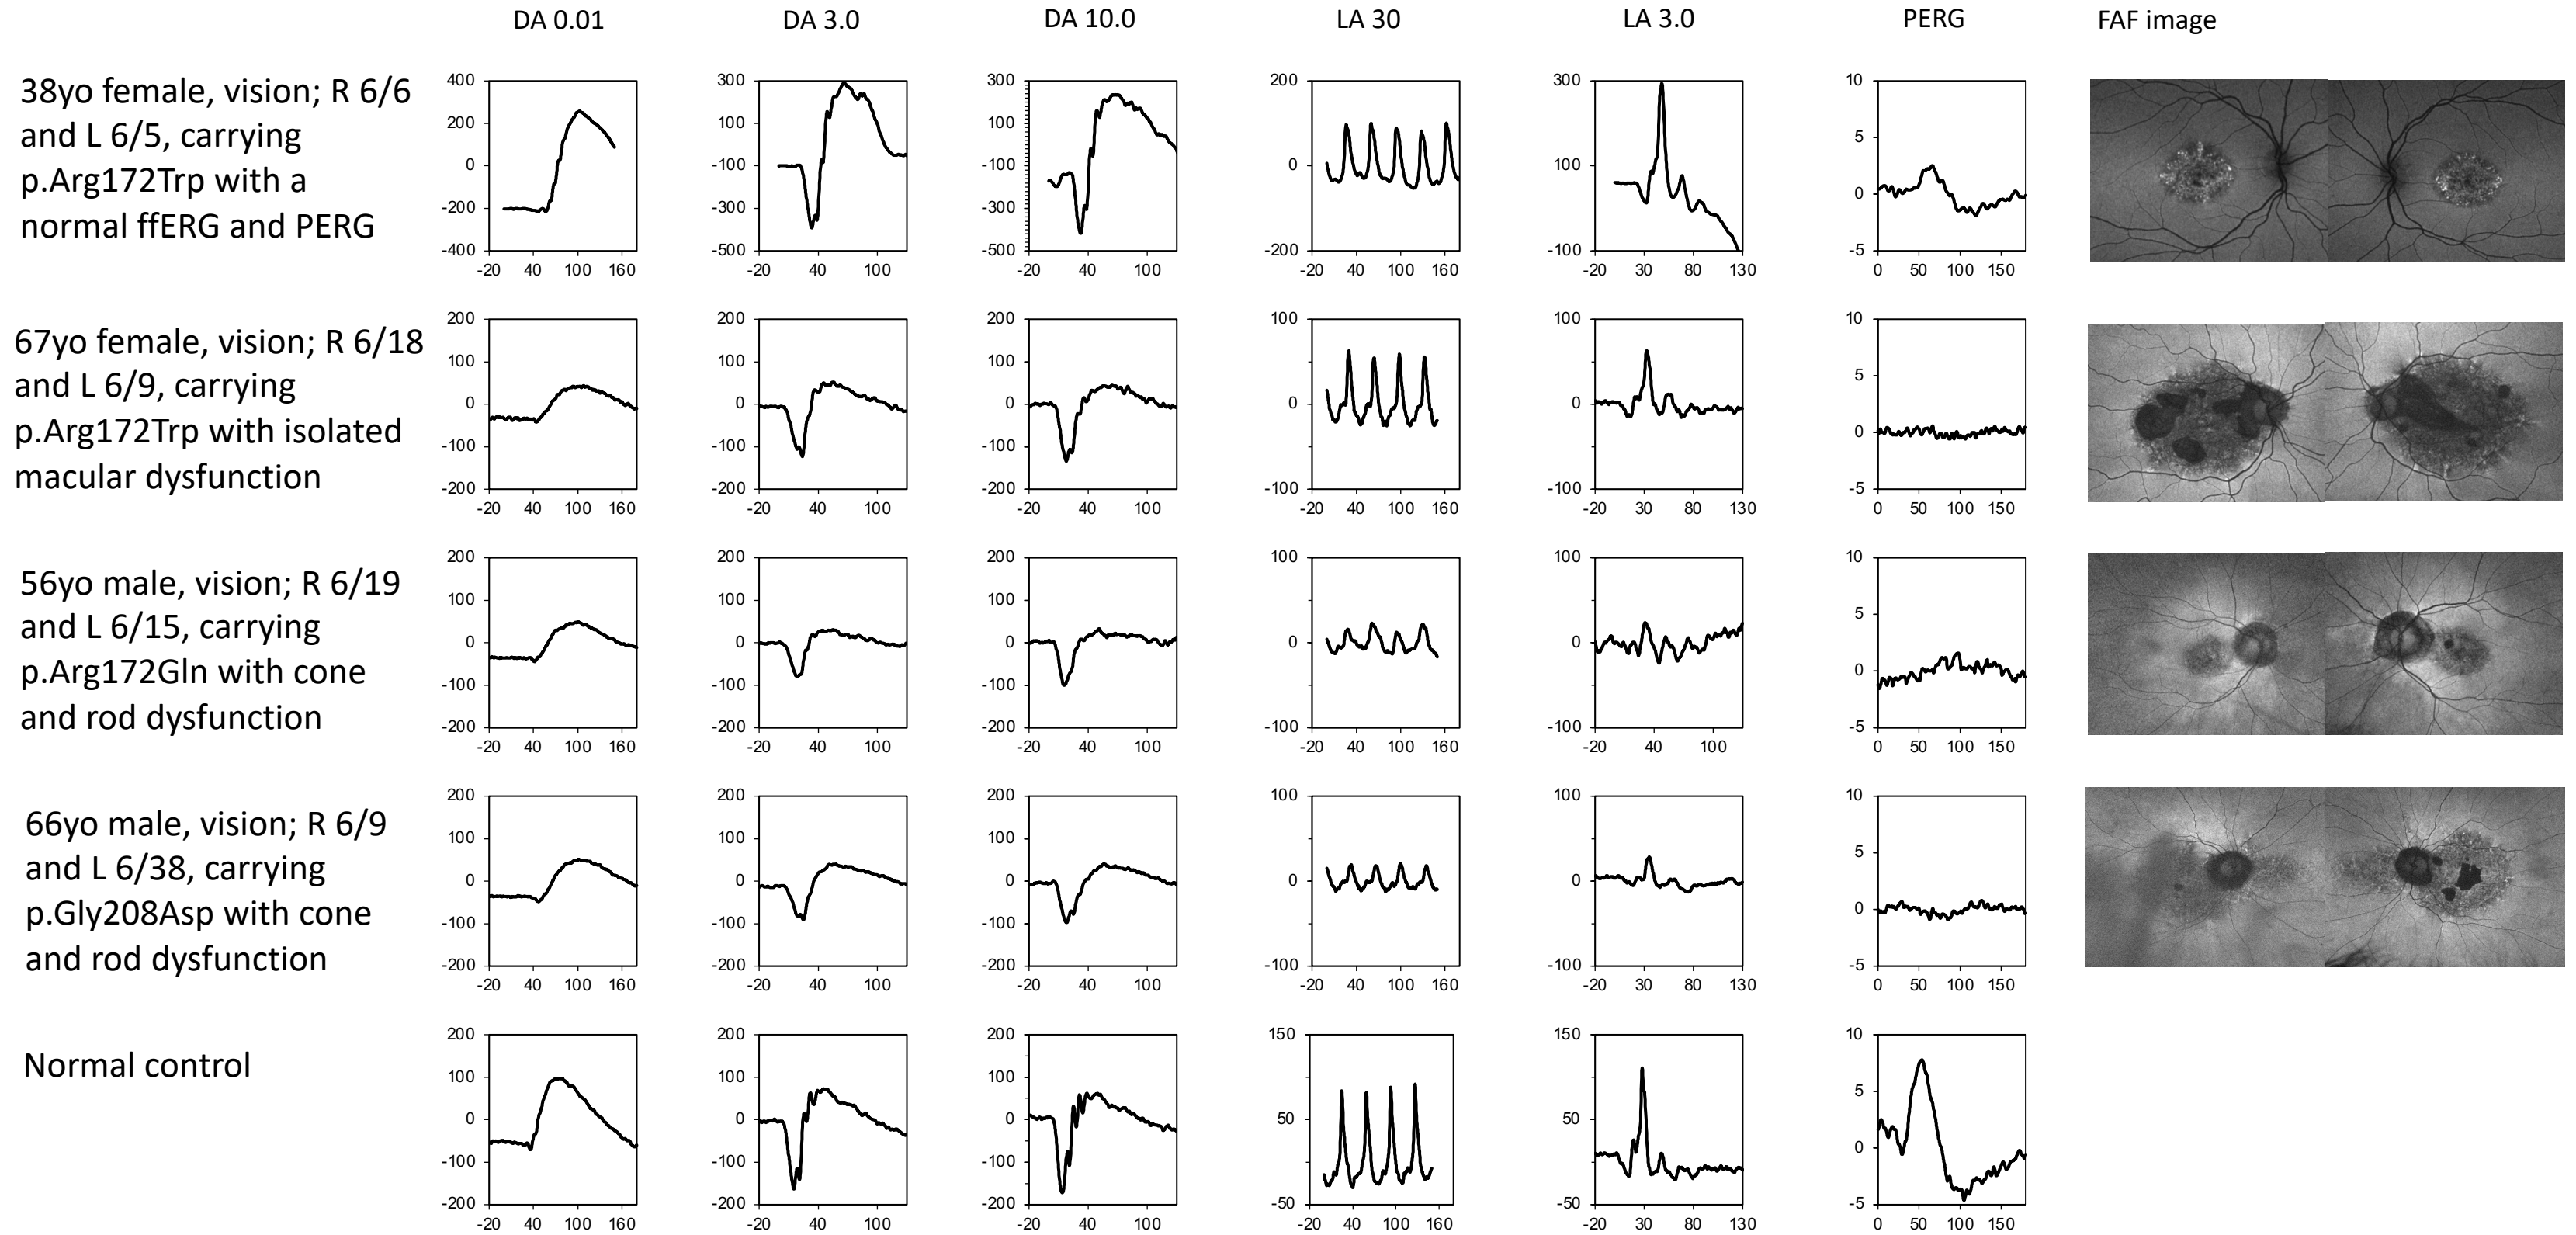

Supplement: iovs-65-5-22_s003.pdf [file iovs-65-5-22_s003.pdf]
