# Supplementary material for: Retinal Dystrophies Associated With Peripherin-2: Genetic Spectrum and Novel Clinical Observations in 241 Patients
Source: PubMed Central journal article supplement — Invest Ophthalmol Vis Sci. 2024 May 14;65(5):22. doi: 10.1167/iovs.65.5.22 (PMC11098050; doi:10.1167/iovs.65.5.22), 2024-05-14
Supplement: iovs-65-5-22_s001.pdf [file iovs-65-5-22_s001.pdf]

## Supplementary Material S1

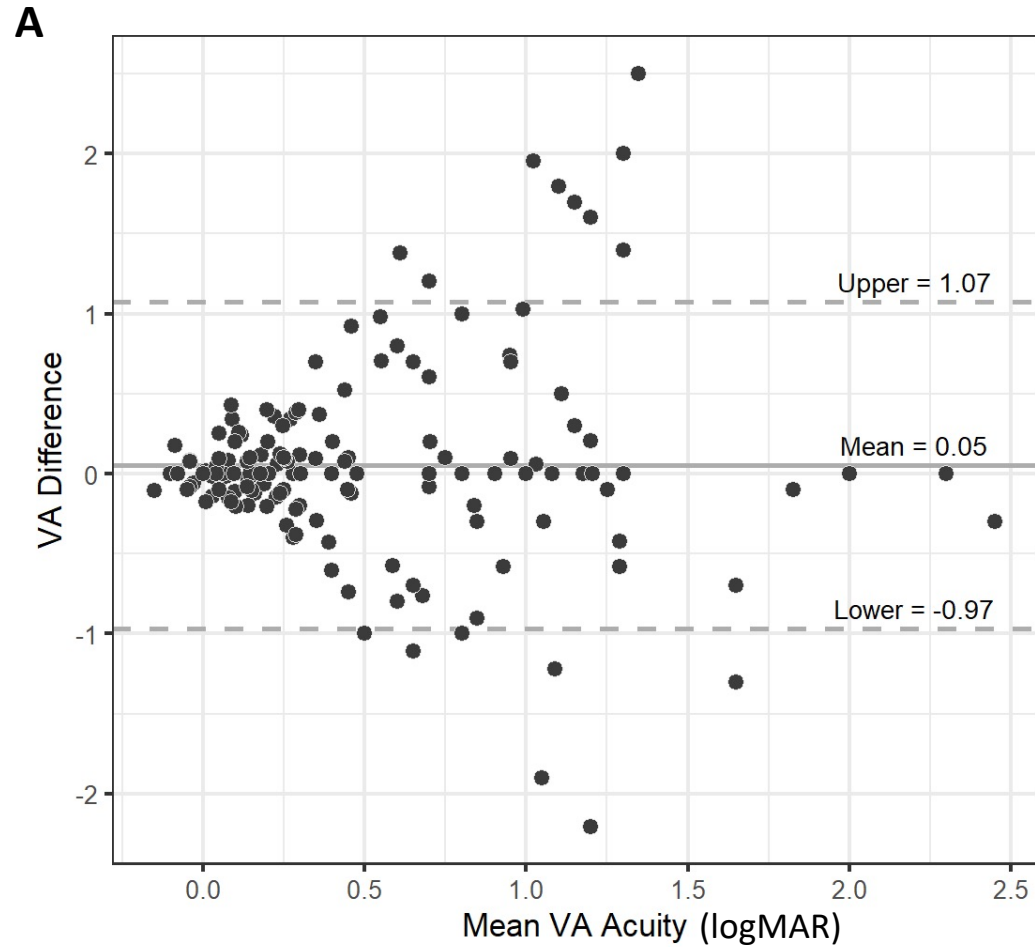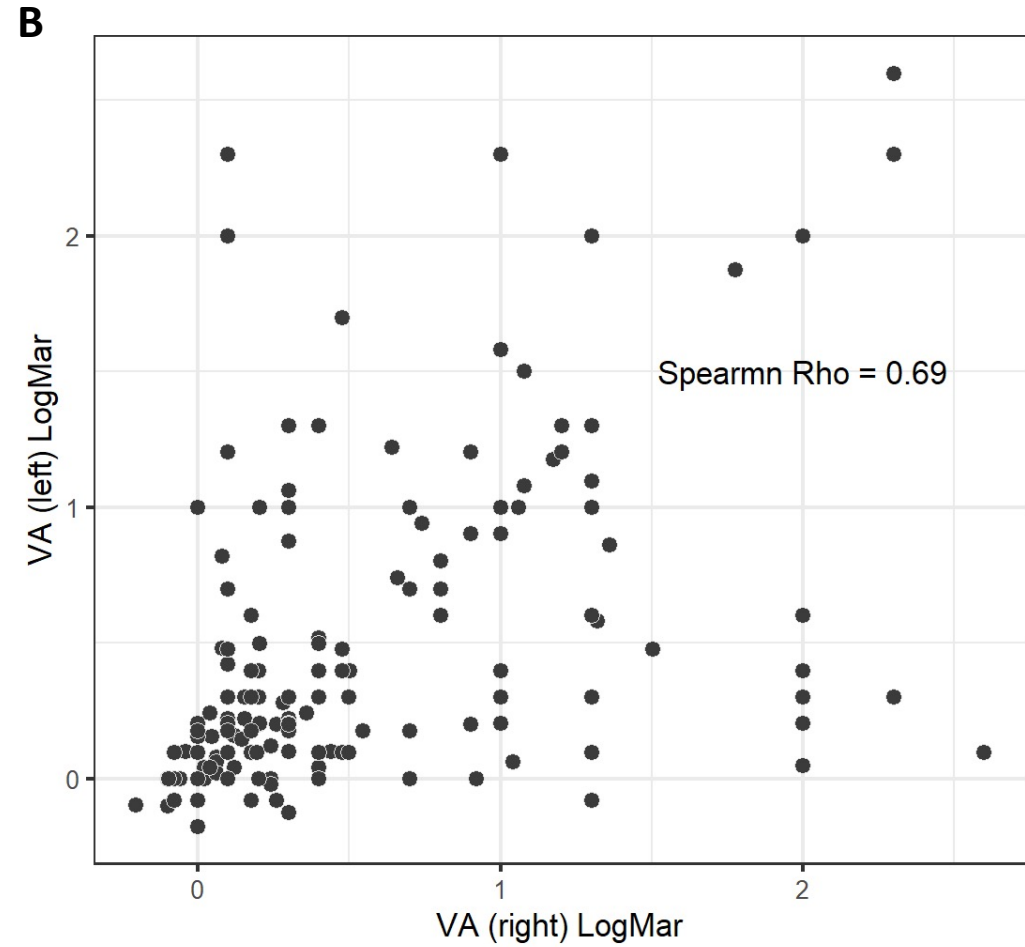

Bland Altman plot of right vs left eye visual acuity (A) showing increasing dispersion between the two eyes as the visual acuity logMAR value increases. Right vs left eye visual acuity scatter plot (B) showing a moderate correlation in visual acuity between the two eyes.
