# Supplementary material for: Retinal Dystrophies Associated With Peripherin-2: Genetic Spectrum and Novel Clinical Observations in 241 Patients
Source: PubMed Central journal article supplement — Invest Ophthalmol Vis Sci. 2024 May 14;65(5):22. doi: 10.1167/iovs.65.5.22 (PMC11098050; doi:10.1167/iovs.65.5.22), 2024-05-14

## Supplementary Material S2

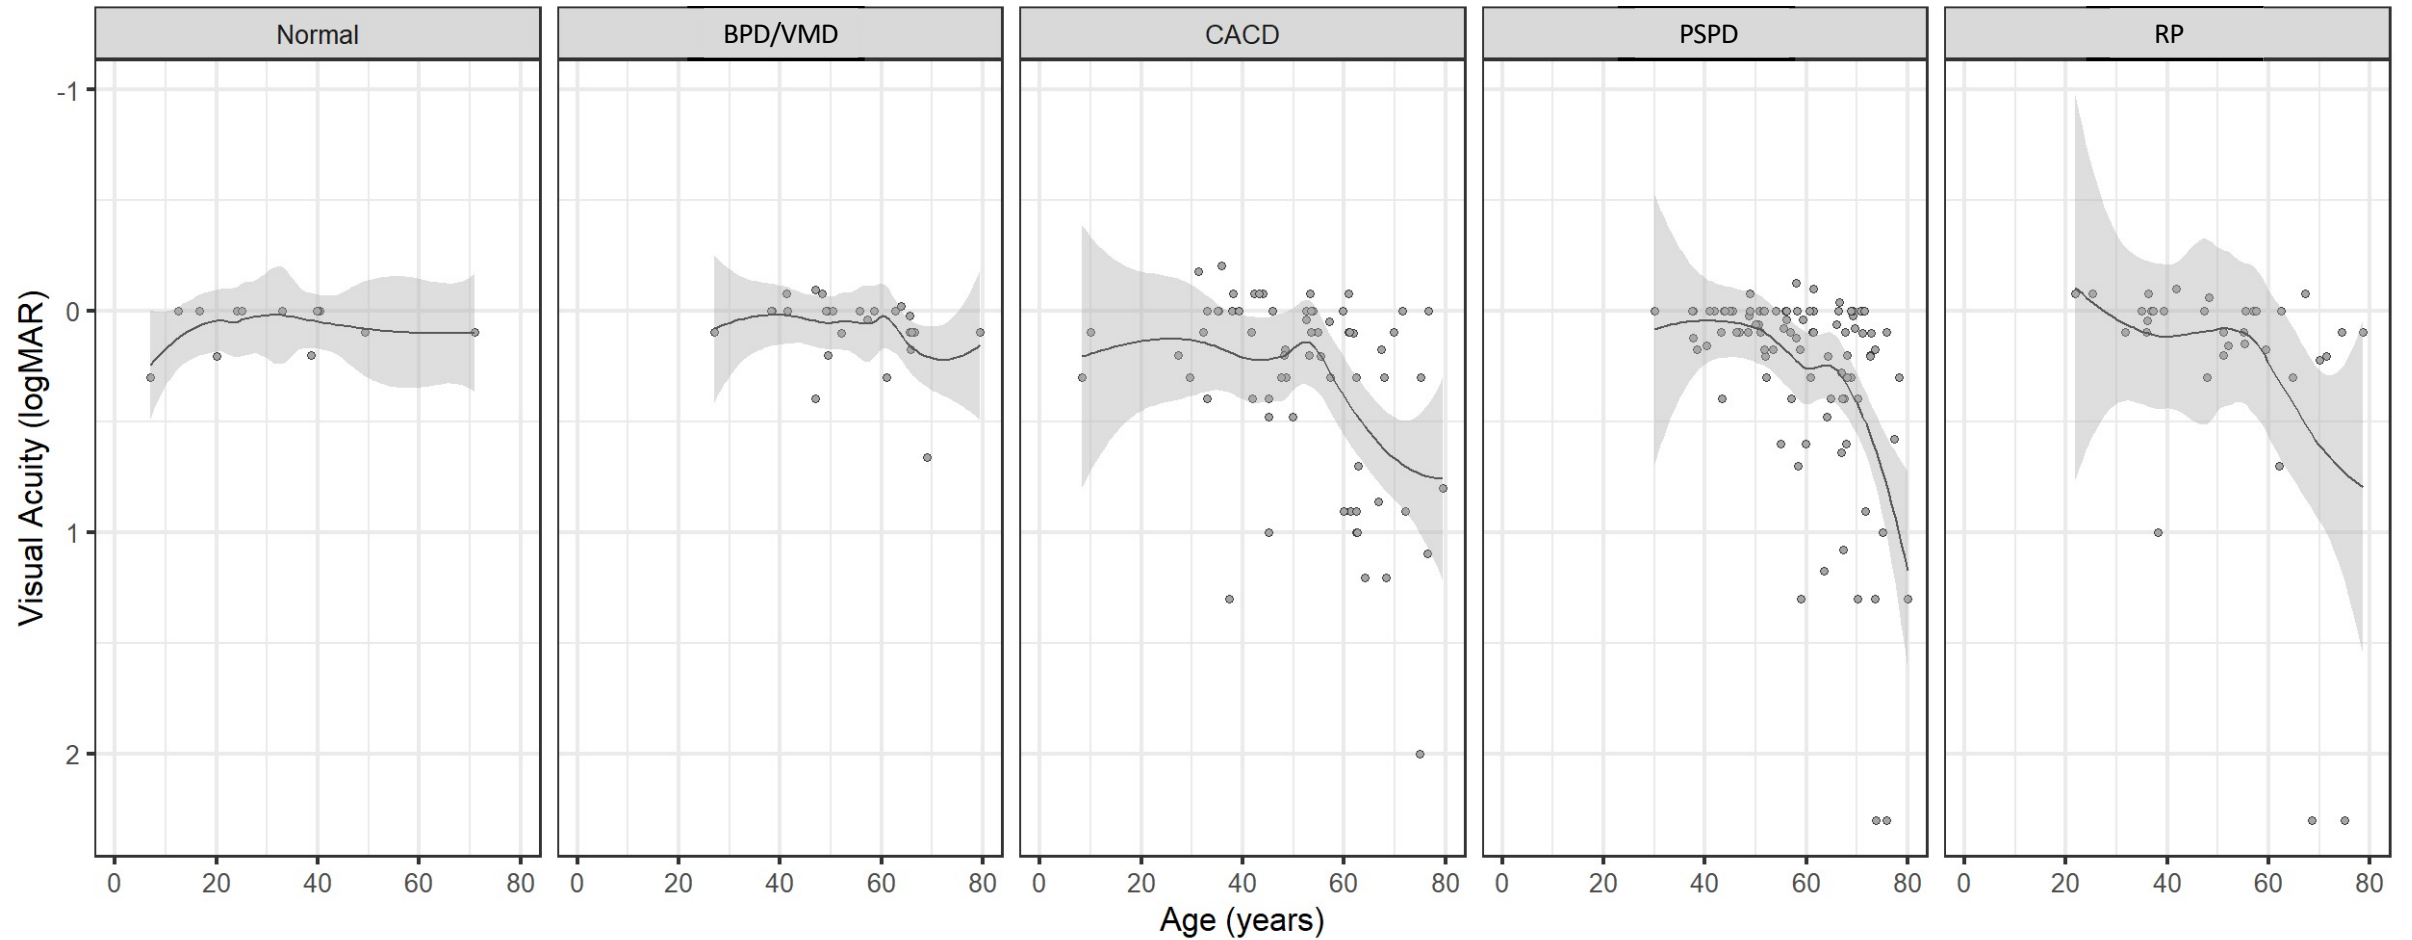

LOESS curves of the mean visual acuity (VA) change with age across five fundus autofluorescence groups: normal, butterfly pattern dystrophy (BPD), vitelliform macular dystrophy (VMD), central areolar choroidal dystrophy (CACD), pseudo-Stargardt pattern dystrophy (PSPD) and retinitis pigmentosa (RP). Note VA tended to decline in the 6<sup>th</sup> decade for the CACD, PSPD and RP groups.

Histogram of the visual acuity classification in the better-seeing eye with age across five fundus autofluorescence groups: normal, butterfly pattern dystrophy (BPD), vitelliform macular dystrophy (VMD), central areolar choroidal dystrophy (CACD), pseudo-Stargardt pattern dystrophy (PSPD) and retinitis pigmentosa (RP).

World Health Organization visual impairment classification:  
 Normal:  $\geq 20/40$   
 Mild:  $< 20/40$  and  $\geq 20/60$   
 Moderate:  $< 20/60$  and  $\geq 20/200$   
 Severe:  $< 20/200$  and  $\geq 20/400$   
 Blind:  $< 20/400$

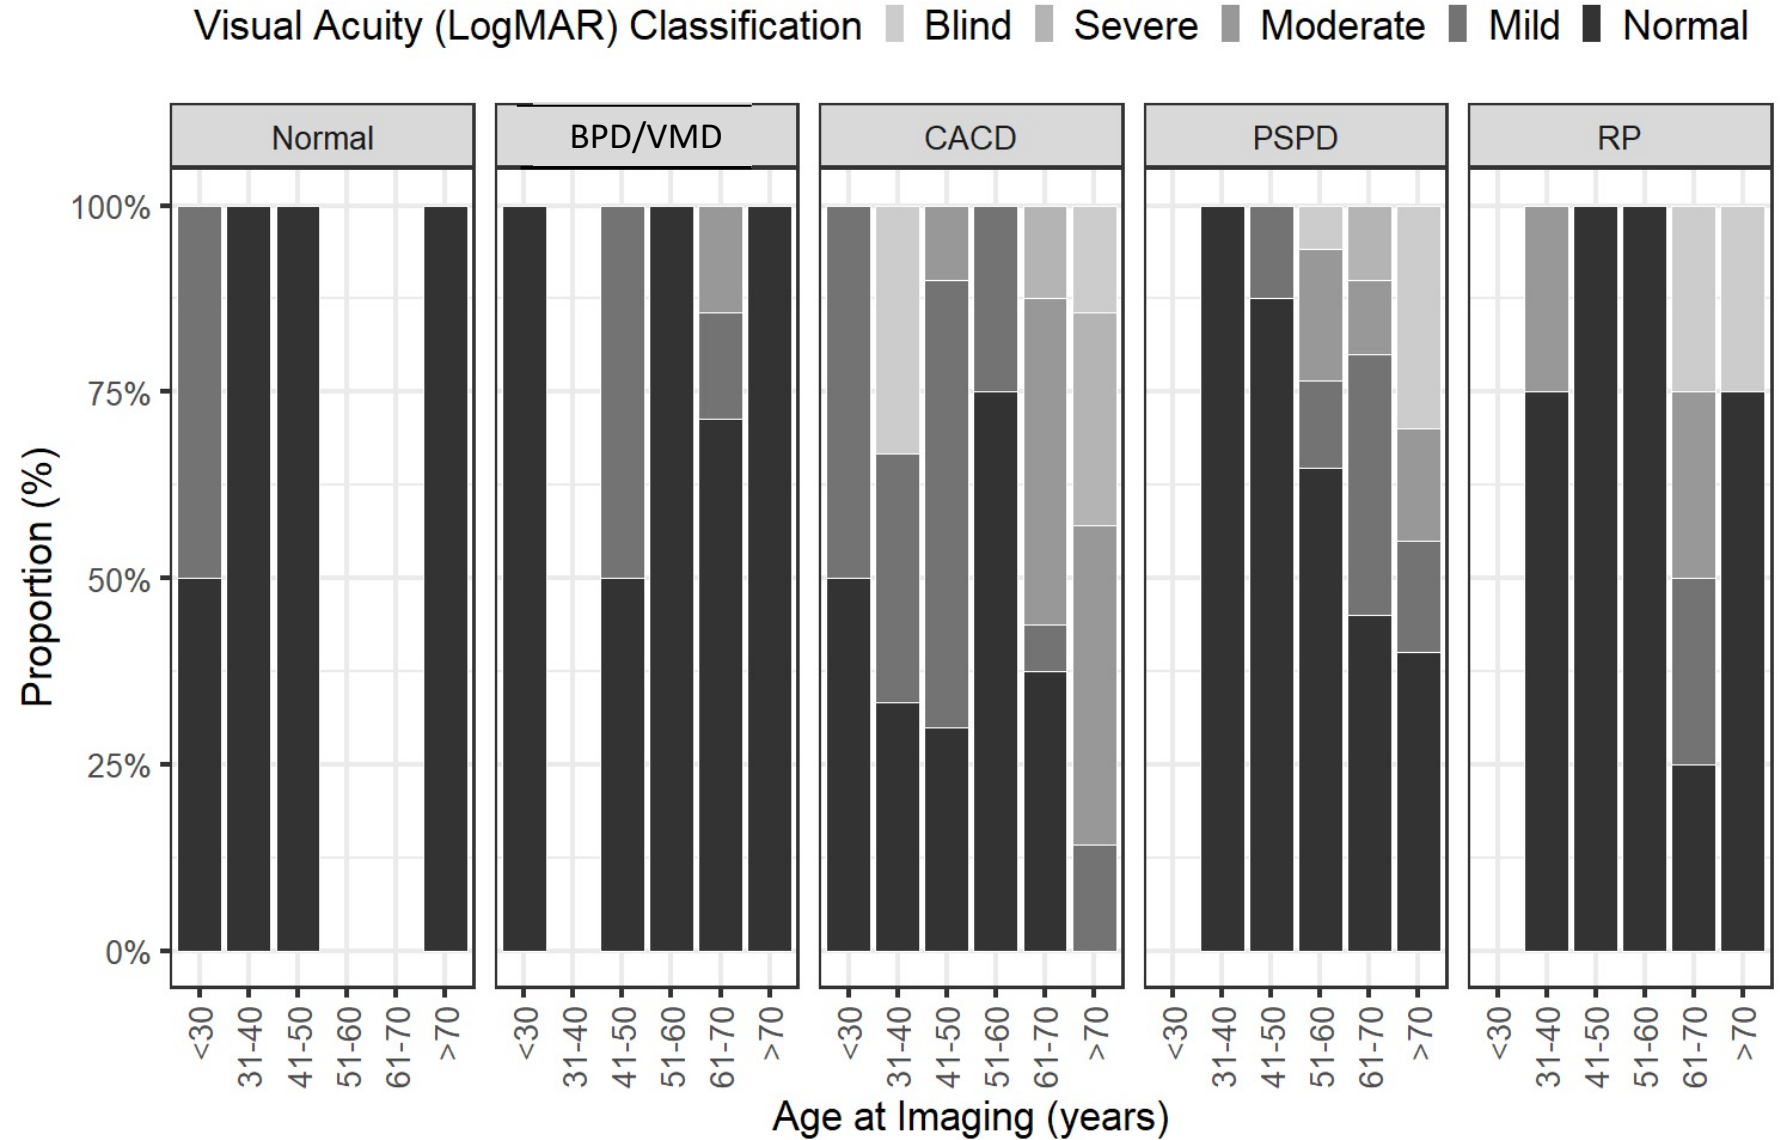

Supplement: iovs-65-5-22_s002.pdf [file iovs-65-5-22_s002.pdf]
